# Supplementary material for: Estimating seroprevalence of SARS-CoV-2 infection after a highly contagious Omicron outbreak: A cross sectional study in a university setting
Source: bioRxiv or medRxiv preprint supplement (doi:10.1101/2023.08.29.23293775), 2023-08-29
Supplement: Supplementary file [file media-1.pdf]

**Supplemental data for**  
**Estimating seroprevalence of SARS-CoV-2 infection after a highly contagious**  
**Omicron outbreak: A cross sectional study in a university setting**

Ching-Wen Hou<sup>1</sup>, Stacy Williams<sup>1</sup>, Guillermo Trivino-Soto<sup>1</sup>, Veronica Boyle<sup>1</sup>, David Rainford<sup>1</sup>, Selina Vicino<sup>1</sup>, Mitch Magee<sup>1</sup>, Yunro Chung<sup>1,2</sup>, Joshua LaBaer<sup>1</sup>, Vel Murugan<sup>1\*</sup>

<sup>1</sup>Virginia G. Piper Center for Personalized Diagnostics, Biodesign Institute, Arizona State University, Tempe, AZ, USA

<sup>2</sup>College of Health Solutions, Arizona State University, Phoenix, AZ, USA

\*Corresponding author. Email: [vel.murugan@asu.edu](mailto:vel.murugan@asu.edu)

**Supplementary Table 1: Anti-RBD and Anti-NC antibody seroprevalence status of the population from Serosurvey II**

| Antigen Detected | Ab Sub-Type | Manufacturer    | Name of the test                        | Assay type                                | Positives    | Negative    | Inconclusive |
|------------------|-------------|-----------------|-----------------------------------------|-------------------------------------------|--------------|-------------|--------------|
| RBD              | IgG         | Beckman Coulter | Access SARS-CoV-2 IgG II                | Chemiluminescent Immunoassay (CLA)        | 1346 (96.3%) | 51 (3.7%)   | 0 (0%)       |
|                  |             | MSD             | V-PLEX COVID-19 Respiratory Panel 3 Kit | Electrochemiluminescent immunoassay (ECL) | 1369 (98%)   | 28 (2%)     | 0 (0%)       |
|                  | IgM         | Beckman Coulter | Access SARS-CoV-2 IgM                   | Chemiluminescent Immunoassay (CLA)        | 28 (2%)      | 1369 (98%)  | 0 (0%)       |
| NC               | IgG         | MSD             | V-PLEX COVID-19 Respiratory Panel 3 Kit | Electrochemiluminescent immunoassay (ECL) | 578 (41.4%)  | 819 (58.6%) | 0 (0%)       |
|                  | Total Ab    | Bio-Rad         | Platelia SARS-CoV-2 Total Ab Assay      | Enzyme-Linked Immunosorbent Assay (ELISA) | 546 (39.1%)  | 823 (58.9%) | 28 (2%)      |

**Supplementary Table 2:** Cohort characteristics and serological positive results by different assays from Serosurvey II

| Cohort         |                  |      | Spike Protein |             | Nucleocapsid Protein |             |
|----------------|------------------|------|---------------|-------------|----------------------|-------------|
| Infection      | Vaccine          | n    | IgG           |             | Total ab             | IgG         |
|                |                  |      | Beckman       | MSD         | ELISA                | MSD         |
| Yes<br>(n=529) | YES <sup>A</sup> | 491  | 488 (99.4%)   | 484 (98.6%) | 348 (70.9%)          | 352 (71.7%) |
|                | YES <sup>B</sup> | 4    | 4 (100%)      | 3 (75%)     | 4 (100%)             | 4 (100%)    |
|                | YES*             | 3    | 3 (100%)      | 3 (100%)    | 3 (100%)             | 3 (100%)    |
|                | NO               | 30   | 21 (70%)      | 24 (80%)    | 25 (83.3%)           | 25 (83.3%)  |
|                | NA               | 1    | 1 (100%)      | 1 (100%)    | 1 (100%)             | 1 (100%)    |
| No<br>(n=853)  | YES <sup>A</sup> | 805  | 781 (97%)     | 799 (99.3%) | 133 (16.5%)          | 160 (19.9%) |
|                | YES <sup>B</sup> | 12   | 11 (91.7%)    | 10 (83.3%)  | 10 (83.3%)           | 10 (83.3%)  |
|                | YES*             | 3    | 3 (100%)      | 3 (100%)    | 2 (66.7%)            | 2 (66.7%)   |
|                | NO               | 31   | 18 (58.1%)    | 26 (83.9%)  | 12 (38.7%)           | 13 (41.9%)  |
|                | NA               | 2    | 1 (50%)       | 1 (50%)     | 0                    | 0           |
| NA<br>(n=15)   | YES              | 5    | 5 (100%)      | 5 (100%)    | 2 (40%)              | 2 (40%)     |
|                | NA               | 10   | 10 (100%)     | 10 (100%)   | 6 (60%)              | 6 (60%)     |
| Total          |                  | 1397 | 1346 (96.3%)  | 1369 (98%)  | 546 (39.1%)          | 578 (41.4%) |

A: Pfizer, Moderna, AstraZeneca, and Janssen; B: Covaxin, Sinopharm, \*: Participants did not provide vaccine source

**Supplementary Table 3: Seroconversion by race, age, gender, employment status, and the types of vaccines from Serosurvey II (Bold indicates statistically significant differences)**

| Variable                   | Comparison                    | Anti-RBD Antibody (Access SARS-CoV-2 IgG II) |      |               |             | Anti-NC antibody (Platelia NC total Ab) |      |              |             |
|----------------------------|-------------------------------|----------------------------------------------|------|---------------|-------------|-----------------------------------------|------|--------------|-------------|
|                            |                               | n                                            | OR   | 95% CI        | P-value     | n                                       | OR   | 95% CI       | P-value     |
| Race                       | White vs Other                | 569 vs 289                                   | 0.98 | (0.26, 3.08)  | 0.97        | 218 vs 147                              | 0.55 | (0.33, 0.91) | <b>0.02</b> |
|                            | Asian vs Other                | 355 vs 289                                   | 0.58 | (0.15, 1.86)  | 0.38        | 144 vs 147                              | 1.11 | (0.60, 2.06) | 0.73        |
|                            | White vs Asian                | 569 vs 355                                   | 1.69 | (0.59, 4.89)  | 0.33        | 218 vs 144                              | 0.50 | (0.28, 0.88) | <b>0.02</b> |
| Age                        | 20-30 vs <20                  | 584 vs 162                                   | 0.31 | (0.02, 1.58)  | 0.26        | 264 vs 71                               | 0.73 | (0.36, 1.40) | 0.36        |
|                            | 30-40 vs <20                  | 187 vs 162                                   | 0.40 | (0.02, 3.74)  | 0.46        | 79 vs 71                                | 0.44 | (0.18, 1.02) | 0.06        |
|                            | 40-50 vs <20                  | 123 vs 162                                   | 0.14 | (0.01, 1.24)  | 0.12        | 37 vs 71                                | 1.08 | (0.34, 3.51) | 0.90        |
|                            | 50>= vs <20                   | 157 vs 162                                   | 0.50 | (0.02, 6.84)  | 0.62        | 58 vs 71                                | 0.81 | (0.28, 2.30) | 0.70        |
|                            | 30-40 vs 20-30                | 187 vs 584                                   | 1.31 | (0.34, 6.59)  | 0.72        | 79 vs 264                               | 0.60 | (0.31, 1.15) | 0.12        |
|                            | 40-50 vs 20-30                | 123 vs 584                                   | 0.46 | (0.10, 2.02)  | 0.30        | 37 vs 264                               | 1.47 | (0.56, 4.15) | 0.44        |
|                            | 50>= vs 20-30                 | 157 vs 584                                   | 1.64 | (0.27, 13.17) | 0.60        | 58 vs 264                               | 1.11 | (0.48, 2.63) | 0.81        |
|                            | 40-50 vs 30-40                | 123 vs 187                                   | 0.35 | (0.07, 1.52)  | 0.17        | 37 vs 79                                | 2.47 | (1.00, 6.60) | 0.06        |
|                            | 50>= vs 30-40                 | 157 vs 187                                   | 1.25 | (0.19, 9.94)  | 0.81        | 58 vs 79                                | 1.86 | (0.86, 4.11) | 0.12        |
|                            | 50>= vs 40-50                 | 157 vs 123                                   | 3.60 | (0.75, 25.54) | 0.13        | 58 vs 37                                | 0.76 | (0.27, 1.99) | 0.58        |
| Gender                     | Male vs Female                | 509 vs 704                                   | 0.78 | (0.33, 1.85)  | 0.57        | 216 vs 293                              | 0.83 | (0.54, 1.27) | 0.39        |
| Employment Status          | Student vs Employee           | 728 vs 485                                   | 1.84 | (0.47, 6.50)  | 0.36        | 325 vs 184                              | 0.94 | (0.49, 1.77) | 0.84        |
| Vaccine Group <sup>#</sup> | mRNA vaccine vs Other vaccine | 1020 vs 193                                  | 3.35 | (1.20, 9.29)  | <b>0.02</b> | 381 vs 95                               | 0.58 | (0.30, 1.07) | 0.09        |
|                            | Unvaccinated vs Other vaccine | N/A                                          | N/A  | N/A           | N/A         | 33 vs 95                                | 1.43 | (0.48, 4.86) | 0.54        |
|                            | mRNA vaccine vs Unvaccinated  | N/A                                          | N/A  | N/A           | N/A         | 381 vs 33                               | 0.40 | (0.13, 1.01) | 0.07        |

<sup>#</sup>Unvaccinated samples were not included for the anti-RBD Antibody (Access SARS-CoV-2 IgG II)

**Supplementary Table 4:** Anti-RBD antibody difference by race, age, gender, employment status, and the types of vaccines controlling for days post vaccination from Serosurvey II (Bold indicates statistically significant differences)

| Variable          | Comparison            |             |                 |                  |                  |
|-------------------|-----------------------|-------------|-----------------|------------------|------------------|
|                   |                       | n           | beta            | 95% CI           | P-value          |
| Race              | White vs Other        | 569 vs 289  | -25.04          | (-62.28, 12.20)  | 0.19             |
|                   | Asian vs Other        | 355 vs 289  | -7.37           | (-48.57, 33.82)  | 0.73             |
|                   | White vs Asian        | 569 vs 355  | -17.66          | (-55.56, 20.23)  | 0.36             |
| Age               | 20-30 vs <20          | 584 vs 162  | -10.65          | (-55.61, 34.30)  | 0.64             |
|                   | 30-40 vs <20          | 187 vs 162  | -36.71          | (-97.60, 24.19)  | 0.24             |
|                   | 40-50 vs <20          | 123 vs 162  | -54.95          | (-127.47, 17.57) | 0.14             |
|                   | 50>= vs <20           | 157 vs 162  | 30.89           | (-40.55, 102.34) | 0.40             |
|                   | 30-40 vs 20-30        | 187 vs 584  | -26.05          | (-73.81, 21.71)  | 0.29             |
|                   | 40-50 vs 20-30        | 123 vs 584  | -44.30          | (-105.21, 16.62) | 0.15             |
|                   | 50>= vs 20-30         | 157 vs 584  | 41.55           | (-17.52, 100.61) | 0.17             |
|                   | 40-50 vs 30-40        | 123 vs 187  | -18.24          | (-77.34, 40.85)  | 0.55             |
|                   | 50>= vs 30-40         | 157 vs 187  | 67.60           | (11.64, 123.56)  | <b>0.02</b>      |
| 50>= vs 40-50     | 157 vs 123            | 85.85       | (25.98, 145.71) | <b>&lt;0.01</b>  |                  |
| Sex               | Male vs Female        | 509 vs 704  | 18.02           | (-12.16, 48.20)  | 0.24             |
| Employment Status | Student vs Employee   | 728 vs 485  | 0.41            | (-44.91, 45.72)  | 0.99             |
| Vaccine Group     | mRNA vaccine vs Other | 1020 vs 193 | 129.71          | (86.79, 172.63)  | <b>&lt;0.001</b> |

**Supplementary Table 5: Seroconversion by race, age, gender, employment status, and the types of vaccines from Serosurvey I and II (Bold indicates statistically significant differences)**

| Variable                   | Comparison                    | Anti- RBD Antibody (Access SARS-CoV-2 IgG II) |      |               |                  | Anti- NC antibody (Platelia NC total Ab) |      |              |                  |
|----------------------------|-------------------------------|-----------------------------------------------|------|---------------|------------------|------------------------------------------|------|--------------|------------------|
|                            |                               | n                                             | OR   | 95% CI        | P-value          | n                                        | OR   | 95% CI       | P-value          |
| Race                       | White vs Other                | 855 vs 388                                    | 0.73 | (0.34, 1.47)  | 0.40             | 291 vs 167                               | 0.53 | (0.34, 0.81) | <b>&lt;0.01</b>  |
|                            | Asian vs Other                | 495 vs 388                                    | 0.77 | (0.35, 1.62)  | 0.51             | 156 vs 167                               | 1.31 | (0.76, 2.25) | 0.33             |
|                            | White vs Asian                | 855 vs 495                                    | 0.94 | (0.51, 1.74)  | 0.85             | 291 vs 156                               | 0.40 | (0.24, 0.66) | <b>&lt;0.001</b> |
| Age                        | 20-30 vs <20                  | 854 vs 343                                    | 1.25 | (0.63, 2.35)  | 0.51             | 324 vs 102                               | 0.78 | (0.46, 1.28) | 0.33             |
|                            | 30-40 vs <20                  | 226 vs 343                                    | 0.92 | (0.34, 2.70)  | 0.87             | 83 vs 102                                | 0.51 | (0.24, 1.04) | 0.07             |
|                            | 40-50 vs <20                  | 144 vs 343                                    | 0.36 | (0.11, 1.31)  | 0.11             | 44 vs 102                                | 1.00 | (0.39, 2.67) | 1.00             |
|                            | 50>= vs <20                   | 171 vs 343                                    | 0.87 | (0.21, 4.00)  | 0.85             | 61 vs 102                                | 0.94 | (0.39, 2.29) | 0.89             |
|                            | 30-40 vs 20-30                | 226 vs 854                                    | 0.74 | (0.31, 2.00)  | 0.52             | 83 vs 324                                | 0.65 | (0.36, 1.18) | 0.16             |
|                            | 40-50 vs 20-30                | 144 vs 854                                    | 0.29 | (0.09, 0.97)  | 0.04             | 44 vs 324                                | 1.29 | (0.56, 3.13) | 0.56             |
|                            | 50>= vs 20-30                 | 171 vs 854                                    | 0.70 | (0.18, 3.01)  | 0.61             | 61 vs 324                                | 1.21 | (0.56, 2.65) | 0.63             |
|                            | 40-50 vs 30-40                | 144 vs 226                                    | 0.40 | (0.12, 1.29)  | 0.12             | 44 vs 83                                 | 1.98 | (0.87, 4.72) | 0.11             |
|                            | 50>= vs 30-40                 | 171 vs 226                                    | 0.94 | (0.24, 3.98)  | 0.93             | 61 vs 83                                 | 1.85 | (0.89, 3.96) | 0.11             |
|                            | 50>= vs 40-50                 | 171 vs 144                                    | 2.38 | (0.69, 9.37)  | 0.18             | 61 vs 44                                 | 0.94 | (0.38, 2.27) | 0.89             |
| Gender                     | Male vs Female                | 759 vs 979                                    | 0.90 | (0.53, 1.52)  | 0.70             | 274 vs 340                               | 0.93 | (0.64, 1.34) | 0.69             |
| Employment Status          | Student vs Employee           | 1209 vs 529                                   | 0.75 | (0.28, 1.88)  | 0.55             | 422 vs 192                               | 0.76 | (0.43, 1.33) | 0.34             |
| Vaccine Group <sup>#</sup> | mRNA vaccine vs Other         | 1465 vs 273                                   | 8.11 | (4.60, 14.56) | <b>&lt;0.001</b> | 455 vs 115                               | 1.03 | (0.62, 1.69) | 0.89             |
|                            | Unvaccinated vs Other vaccine | N/A                                           | N/A  | N/A           | N/A              | 44 vs 115                                | 1.81 | (0.79, 4.40) | 0.17             |
|                            | mRNA vaccine vs Unvaccinated  | N/A                                           | N/A  | N/A           | N/A              | 455 vs 44                                | 0.57 | (0.26, 1.17) | 0.14             |

<sup>#</sup>Unvaccinated samples were not included for the anti-RBD Antibody (Access SARS-CoV-2 IgG II)

**Supplementary Table 6:** Anti-RBD antibody difference by race, age, gender, employment status, and the types of vaccines controlling for days post vaccination from Serosurvey I and II (Bold indicates statistically significant differences)

| Variable          | Comparison            |             |                 |                   |                  |
|-------------------|-----------------------|-------------|-----------------|-------------------|------------------|
|                   |                       | n           | beta            | 95% CI            | P-value          |
| Race              | White vs Other        | 855 vs 388  | -34.22          | (-60.90, -7.53)   | <b>0.01</b>      |
|                   | Asian vs Other        | 495 vs 388  | -20.37          | (-50.70, 9.95)    | 0.19             |
|                   | White vs Asian        | 855 vs 495  | -13.84          | (-40.26, 12.57)   | 0.30             |
| Age               | 20-30 vs <20          | 854 vs 343  | -13.70          | (-41.88, 14.48)   | 0.34             |
|                   | 30-40 vs <20          | 226 vs 343  | -37.13          | (-79.31, 5.05)    | 0.08             |
|                   | 40-50 vs <20          | 144 vs 343  | -64.39          | (-116.87, -11.92) | <b>0.02</b>      |
|                   | 50>= vs <20           | 171 vs 343  | 18.61           | ( -33.51, 70.73)  | 0.48             |
|                   | 30-40 vs 20-30        | 226 vs 854  | -23.43          | (-59.59, 12.72)   | 0.20             |
|                   | 40-50 vs 20-30        | 144 vs 854  | -50.70          | (-97.90, -3.50)   | <b>0.04</b>      |
|                   | 50>= vs 20-30         | 171 vs 854  | 32.31           | (-14.11, 78.72)   | 0.17             |
|                   | 40-50 vs 30-40        | 144 vs 226  | -27.26          | (-74.31, 19.78)   | 0.26             |
|                   | 50>= vs 30-40         | 171 vs 226  | 55.74           | (10.38, 101.10)   | <b>0.02</b>      |
| 50>= vs 40-50     | 171 vs 144            | 83.00       | (34.38, 131.63) | <b>&lt;0.001</b>  |                  |
| Sex               | Male vs Female        | 759 vs 979  | 17.28           | (-4.38, 38.93)    | 0.12             |
| Employment Status | Student vs Employee   | 1209 vs 529 | -17.25          | (-52.72, 18.21)   | 0.34             |
| Vaccine Group     | mRNA vaccine vs Other | 1465 vs 273 | 97.24           | (67.06, 127.42)   | <b>&lt;0.001</b> |

**Supplementary Table 7:** The comparison of key outcome variables between the two serosurveys

| <b>Serosurvey</b>                    | <b>I</b>        | <b>II</b>       |
|--------------------------------------|-----------------|-----------------|
| Study Dates                          | 9/13-9/17, 2021 | 3/1-3/3,2022    |
| % Vaccinated (self-reported)         | 91.9%           | 94.7%           |
| % Infected (self-reported)           | 19.3%           | 37.9%           |
| % of positive result of anti-RBD IgG | 88.2% (Beckman) | 96.3% (Beckman) |
|                                      | 97% (MSD)       | 98% (MSD)       |
| % of positive result of anti-N       | 19.7% (Bio-Rad) | 39.1% (Bio-Rad) |
|                                      | 16.1% (MSD)     | 41.4 % (MSD)    |
| % Unknow infection                   | 8.9% (Bio-Rad)  | 16.5% (Bio-Rad) |
|                                      | 9.4% (MSD)      | 19.9% (MSD)     |



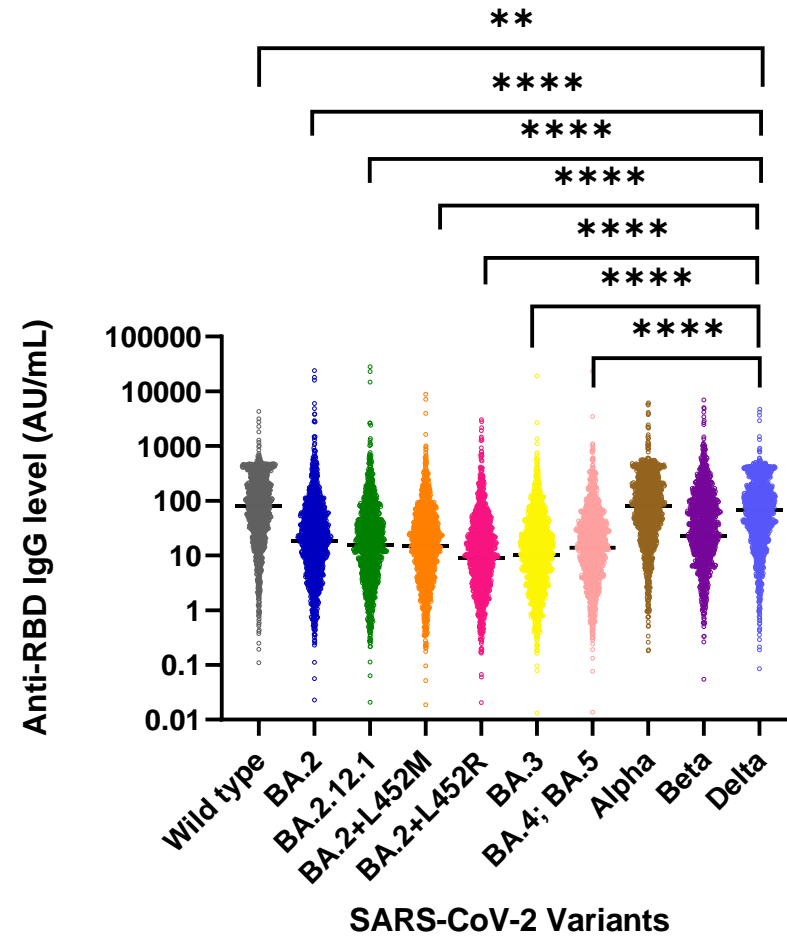

**Supplementary Figure 1: Median level of antibody levels of different variants using MSD assay.** Anti-RBD antibodies were measured using different variants of antigens with the MSD platform. \*P value is calculated by the Mann-Whitney test. \*p-value <0.05, \*\*p-value <0.01, \*\*\*p-value <0.001 and \*\*\*\*p-value <0.0001.
